# Supplementary material for: Short-Term Tropisetron Treatment and Cognitive and P50 Auditory Gating Deficits in Schizophrenia
Source: Atypon-hosted journal article supplement (doi:10.1176/appi.ajp.2012.11081289), 2012-09-01

Contains: 1 table, 3 figures

**TABLE S1. Demographic data in four groups**

| Characteristic and Measure   | Placebo |      | 5mg    |      | 10mg   |      | 20mg   |      | Analysis       |      |
|------------------------------|---------|------|--------|------|--------|------|--------|------|----------------|------|
|                              | (N=10)  |      | (N=10) |      | (N=10) |      | (N=10) |      |                |      |
|                              | N       | %    | N      | %    | N      | %    | N      | %    | X <sup>2</sup> | p    |
| Male Sex                     | 7       | 70   | 8      | 80   | 7      | 70   | 8      | 80   | 0.53           | 0.91 |
|                              | Mean    | SD   | Mean   | SD   | Mean   | SD   | Mean   | SD   | ANOVA F        | p    |
| Age (yrs)                    | 33.6    | 9.8  | 29.6   | 8.9  | 27.1   | 5.9  | 31.5   | 9.9  | 0.90           | 0.45 |
| Education (yrs)              | 7.4     | 2.1  | 8.3    | 3.3  | 8.0    | 1.9  | 6.6    | 1.5  | 0.88           | 0.46 |
| Duration of Illness (months) | 42.3    | 52.7 | 48.9   | 38.8 | 50.3   | 47.2 | 40.3   | 47.6 | 0.10           | 0.96 |
| Risperidone dose (mg/day)    | 4.6     | 1.9  | 4.4    | 1.9  | 4.8    | 1.7  | 5.4    | 1.7  | 1.02           | 0.42 |

**Note:** no significant differences were observed among the dosage and placebo groups on any demographic characteristic.

**FIGURE S1.** Flow chart of study participants

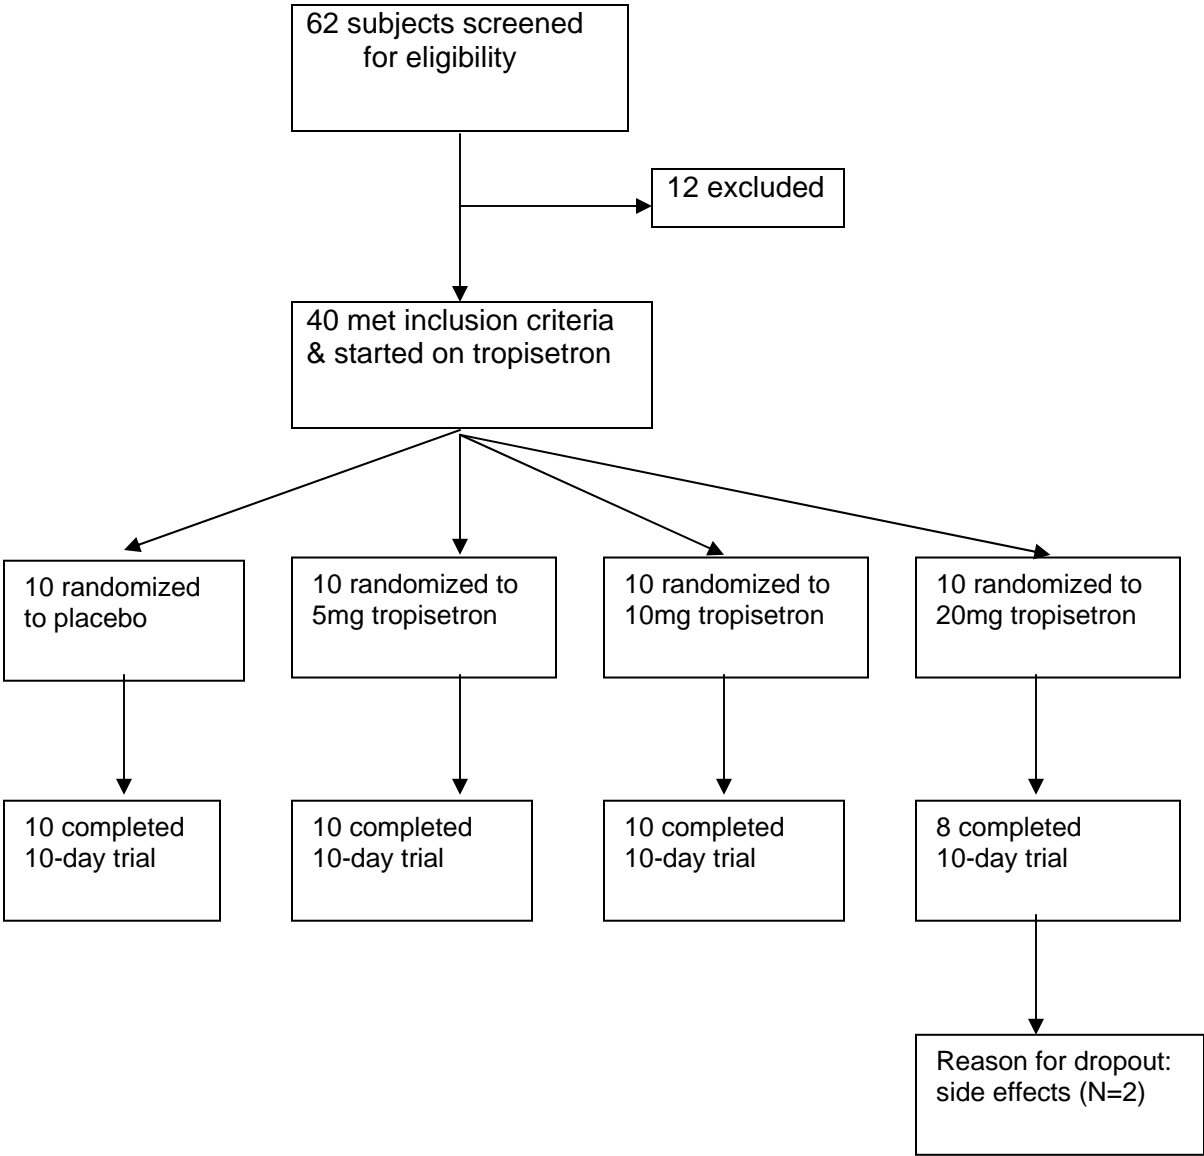

**FIGURE S2.** The P50 gating ratio was significantly lower than placebo in the 10 mg ( $p=0.001$ ; effect size=2.01), 5 mg ( $p=0.001$ ; effect size=1.39) and 20mg ( $p=0.004$ ; effect size=1.41)

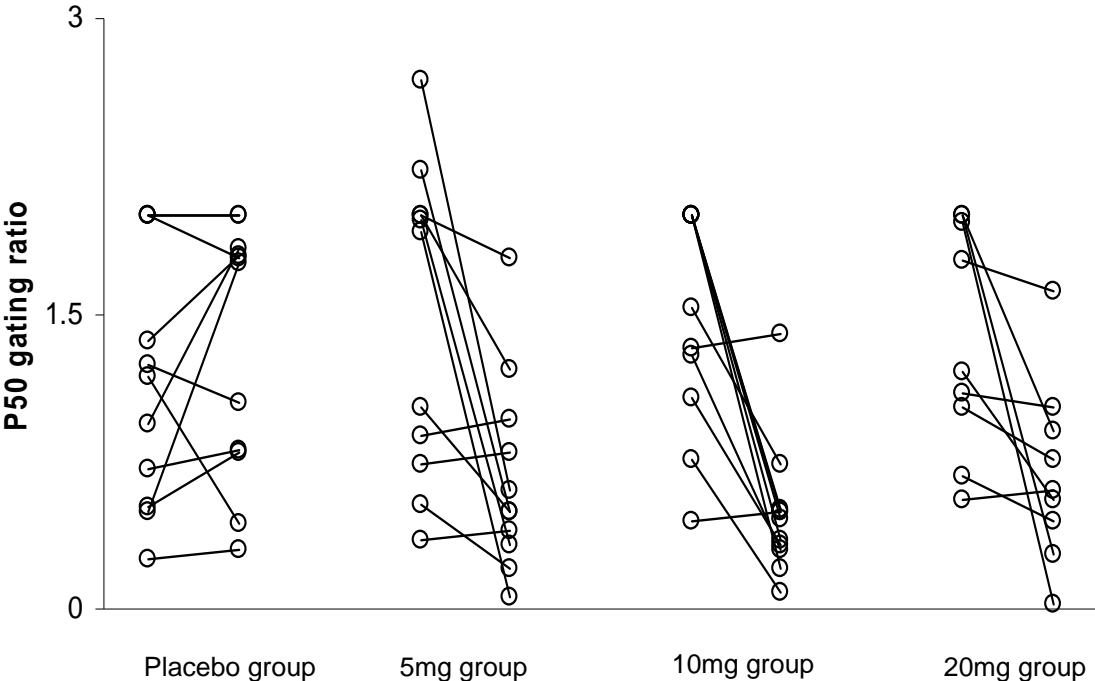

**FIGURE S3.** Grand average for the patients (n=40) at the baseline (A), the placebo group (n=10) (B) and the three active treatment group of tropisetron (C for 5mg, n=10; D for 10mg, n=10, and E for 20mg, n=8) at post-treatment. Click onset is at 0 ms. Blue thick line: S1 response waveform; pink line: S2 response waveform. Arrows show the location of P50 wave. Positive polarity is downwards.

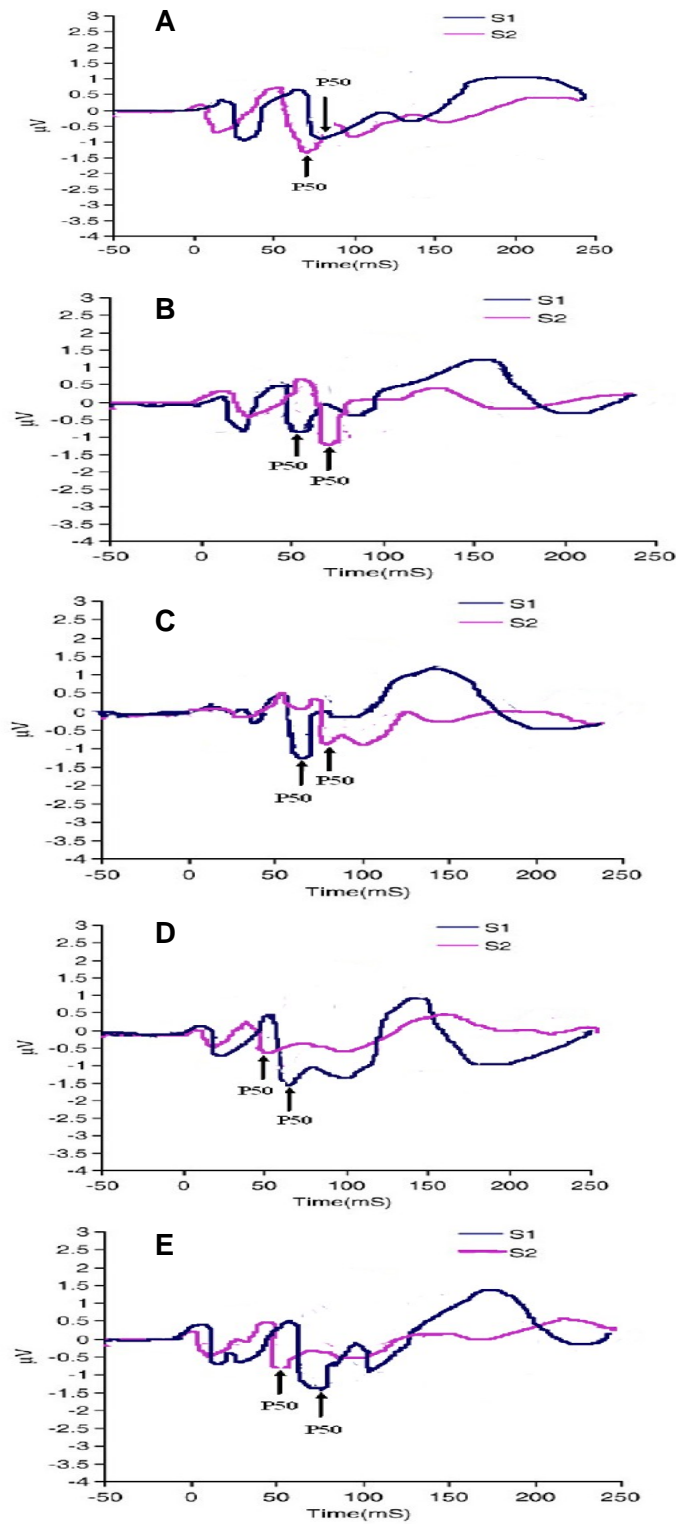

Supplement: appi.ajp.2012.11081289_ds001.pdf [file appi.ajp.2012.11081289_ds001.pdf]
